# Supplementary material for: Magnesium efflux from Drosophila Kenyon cells is critical for normal and diet-enhanced long-term memory
Source: eLife. 2020 Nov 26;9:e61339. doi: 10.7554/eLife.61339 (PMC7843133; doi:10.7554/eLife.61339)
Supplement: Figure 2—source data 1. [file elife-61339-fig2-data1.xlsx]

## Sheet: Sugar and Odor acuity
Genotype/Treatment	Sugar acuity	Odor acuity
		Octanol	Methylcyclohexanol
wild-type (1mM MgCl2 food)	0.50±0.05	0.57±0.04	0.53±0.05
wild-type (80mM MgCl2 food)	0.52±0.04	0.47±0.04	0.50±0.05
uexMI01943/uexMI01943 (1mM MgCl2 food)	0.49±0.04	0.54±0.03	0.47±0.03
uexMI01943/uexMI01943 (80mM MgCl2 food)	0.52±0.03	0.53±0.03	0.44±0.04
uexT626NRR/uexT626NRR(1mM MgCl2 food)	0.55±0.04	0.49±0.04	0.49±0.03
uexT626NRR/uexT626NRR (80mM MgCl2 food)	0.54±0.02	0.50±0.04	0.54±0.05
c739/+ (1mM MgCl2 food)	0.48±0.03	0.57±0.04	0.46±0.08
c739/+ (80mM MgCl2 food)	0.53±0.04	0.55±0.04	0.50±0.06
UAS-uexRNAi/+ (1mM MgCl2 food)	0.56±0.06	0.54±0.02	0.45±0.04
UAS-uexRNAi/+ (80mM MgCl2 food)	0.63±0.04	0.51±0.06	0.41±0.05
c739/+; UAS-uexRNAi /+ (1mM MgCl2 food)	0.45±0.08	0.52±0.06	0.42±0.03
c739/+; UAS-uexRNAi/+ (80mM MgCl2 food)	0.43±0.05	0.55±0.07	0.48±0.03
UAS-uex/+ (1mM MgCl2 food)	0.61±0.02	0.50±0.08	0.50±0.05
UAS-uex/+ (80mM MgCl2 food)	0.56±0.04	0.47±0.07	0.53±0.07
c739/+; UAS-uex/+ (1mM MgCl2 food)	0.43±0.05	0.44±0.04	0.36±0.02
c739/+; UAS-uex/+ (80mM MgCl2 food)	0.45±0.04	0.51±0.01	0.42±0.03
c739,uexMI01943 /uexMI01943(1mM MgCl2 food)	0.54±0.06	0.44±0.05	0.51±0.04
c739,uexMI01943 /uexMI01943(80mM MgCl2 food)	0.48±0.03	0.40±0.04	0.46±0.04
uexMI01943/uexMI01943;UAS-uex/+ (1mM MgCl2 food)	0.59±0.08	0.53±0.05	0.45±0.06
uexMI01943/uexMI01943;UAS-uex/+ (80mM MgCl2 food)	0.50±0.07	0.49±0.03	0.48±0.05
c739,uexMI01943/uexMI01943;UAS-uex/+ (1mM MgCl2 food)	0.49±0.03	0.50±0.04	0.56±0.04
c739,uexMI01943/uexMI01943;UAS-uex/+ (80mM MgCl2 food)	0.56±0.03	0.48±0.06	0.47±0.06
wild-type	0.55±0.03	0.52±0.03	0.56±0.03
uexMI01943/+	0.53±0.04	0.48±0.04	0.48±0.03
uexMI01943/uexMI01943	0.58±0.04	0.53±0.04	0.44±0.02
uexMI01943.ex1/uexMI01943.ex1	0.62±0.07	0.49±0.03	0.51±0.03
uexMI01943.ex2/uexMI01943.ex2	0.60±0.04	0.51±0.02	0.48±0.07
wild-type	0.52±0.04	0.45±0.06	0.47±0.07
uex△/+	0.47±0.06	0.49±0.05	0.41±0.03
uex△/uexMI01943	0.53±0.07	0.44±0.03	0.40±0.02
uexMI01943/+	0.52±0.07	0.37±0.06	0.35±0.03
wild-type	0.50±0.04	0.44±0.05	0.47±0.02
UAS-uexRNAi/+	0.57±0.04	0.50±0.06	0.55±0.06
c739/+	0.58±0.06	0.42±0.06	0.43±0.03
c739/+; UAS-uexRNAi/+	0.55±0.04	0.56±0.04	0.54±0.05
c305a/+	0.46±0.05	0.46±0.08	0.54±0.08
c305a/+; UAS-uexRNAi/+	0.48±0.04	0.45±0.03	0.62±0.07
NP7175/+	0.56±0.05	0.44±0.04	0.50±0.08
NP7175/+; UAS-uexRNAi/+	0.65±0.03	0.52±0.06	0.53±0.06
0770/+	0.50±0.03	0.45±0.04	0.38±0.04
0770/+; UAS-uexRNAi/+	0.45±0.05	0.39±0.07	0.47±0.06
wild-type	0.51±0.04	0.47±0.05	0.42±0.05
UAS-uexRNAi/+	0.44±0.05	0.45±0.03	0.51±0.04
c739/+;Gal80ts/+	0.54±0.04	0.50±0.04	0.52±0.04
c739/+;Gal80ts/UAS-uexRNAi	0.49±0.05	0.43±0.05	0.44±0.02
wild-type	0.63±0.04	0.48±0.04	0.54±0.04
uexMI01943/uexMI01943;UAS-uex/+	0.51±0.03	0.52±0.04	0.48±0.03
uexMI01943/uexMI01943;MB247/+	0.53±0.04	0.62±0.03	0.59±0.04
uexMI01943/uexMI01943;MB247/UAS-uex	0.65±0.05	0.59±0.03	0.64±0.03
c739,uexMI01943/uexMI01943	0.57±0.04	0.49±0.03	0.45±0.08
c739,uexMI01943/uexMI01943;UAS-uex/+	0.55±0.04	0.57±0.03	0.54±0.08
wild-type	0.58±0.04	0.50±0.04	0.55±0.05
c739,uexMI01943/+	0.55±0.03	0.52±0.04	0.54±0.07
uexMI01943/uexMI01943;UAS-CNNM2WT/+	0.54±0.03	0.47±0.03	0.50±0.05
c739,uexMI01943/uexMI01943;UAS-CNNM2WT/+	0.58±0.03	0.54±0.02	0.52±0.06
wild-type	0.49±0.04	0.43±0.04	0.49±0.03
uexT626NRR/uexT626NRR	0.58±0.04	0.52±0.03	0.53±0.03
uexT626NRR/+	0.53±0.05	0.45±0.05	0.40±0.03
uexMI01943/uexT626NRR	0.56±0.05	0.47±0.02	0.42±0.06
uexMI01943/+	0.61±0.04	0.48±0.04	0.55±0.08

## Sheet: Shock Avoidance
Genotype/Treatment	Shock Avoidance
wild-type	0.55±0.03
uexMI01943/+	0.49±0.02
uexMI01943/uexMI01943	0.60±0.04
c739/+	0.52±0.03
c739>UAS-uexRNAi	0.57±0.05
UAS-uexRNAi/+	0.47±0.03
