# Supplementary material for: Magnesium efflux from Drosophila Kenyon cells is critical for normal and diet-enhanced long-term memory
Source: eLife journal article supplement (doi:10.7554/elife.61339), 2020-11-26
Supplement: supp [file elife-61339-supp-v1.zip]

**Figure 2 - figure supplement 3**

| Genotype/Treatment                                                                                                  | Sugar acuity | Odor acuity |                    |
|---------------------------------------------------------------------------------------------------------------------|--------------|-------------|--------------------|
|                                                                                                                     |              | Octanol     | Methylcyclohexanol |
| <i>wild-type</i> (1mM MgCl <sub>2</sub> food)                                                                       | 0.50±0.05    | 0.57±0.04   | 0.53±0.05          |
| <i>wild-type</i> (80mM MgCl <sub>2</sub> food)                                                                      | 0.52±0.04    | 0.47±0.04   | 0.50±0.05          |
| <i>uex</i> <sup>MI01943</sup> / <i>uex</i> <sup>MI01943</sup> (1mM MgCl <sub>2</sub> food)                          | 0.49±0.04    | 0.54±0.03   | 0.47±0.03          |
| <i>uex</i> <sup>MI01943</sup> / <i>uex</i> <sup>MI01943</sup> (80mM MgCl <sub>2</sub> food)                         | 0.52±0.03    | 0.53±0.03   | 0.44±0.04          |
| <i>uex</i> <sup>T626NRR</sup> / <i>uex</i> <sup>T626NRR</sup> (1mM MgCl <sub>2</sub> food)                          | 0.55±0.04    | 0.49±0.04   | 0.49±0.03          |
| <i>uex</i> <sup>T626NRR</sup> / <i>uex</i> <sup>T626NRR</sup> (80mM MgCl <sub>2</sub> food)                         | 0.54±0.02    | 0.50±0.04   | 0.54±0.05          |
| <i>c739/+</i> (1mM MgCl <sub>2</sub> food)                                                                          | 0.48±0.03    | 0.57±0.04   | 0.46±0.08          |
| <i>c739/+</i> (80mM MgCl <sub>2</sub> food)                                                                         | 0.53±0.04    | 0.55±0.04   | 0.50±0.06          |
| <i>UAS-uex</i> <sup>RNAi</sup> / <i>+</i> (1mM MgCl <sub>2</sub> food)                                              | 0.56±0.06    | 0.54±0.02   | 0.45±0.04          |
| <i>UAS-uex</i> <sup>RNAi</sup> / <i>+</i> (80mM MgCl <sub>2</sub> food)                                             | 0.63±0.04    | 0.51±0.06   | 0.41±0.05          |
| <i>c739/+; UAS-uex</i> <sup>RNAi</sup> / <i>+</i> (1mM MgCl <sub>2</sub> food)                                      | 0.45±0.08    | 0.52±0.06   | 0.42±0.03          |
| <i>c739/+; UAS-uex</i> <sup>RNAi</sup> / <i>+</i> (80mM MgCl <sub>2</sub> food)                                     | 0.43±0.05    | 0.55±0.07   | 0.48±0.03          |
| <i>UAS-uex/+</i> (1mM MgCl <sub>2</sub> food)                                                                       | 0.61±0.02    | 0.50±0.08   | 0.50±0.05          |
| <i>UAS-uex/+</i> (80mM MgCl <sub>2</sub> food)                                                                      | 0.56±0.04    | 0.47±0.07   | 0.53±0.07          |
| <i>c739/+; UAS-uex/+</i> (1mM MgCl <sub>2</sub> food)                                                               | 0.43±0.05    | 0.44±0.04   | 0.36±0.02          |
| <i>c739/+; UAS-uex/+</i> (80mM MgCl <sub>2</sub> food)                                                              | 0.45±0.04    | 0.51±0.01   | 0.42±0.03          |
| <i>c739,uex</i> <sup>MI01943</sup> / <i>uex</i> <sup>MI01943</sup> (1mM MgCl <sub>2</sub> food)                     | 0.54±0.06    | 0.44±0.05   | 0.51±0.04          |
| <i>c739,uex</i> <sup>MI01943</sup> / <i>uex</i> <sup>MI01943</sup> (80mM MgCl <sub>2</sub> food)                    | 0.48±0.03    | 0.40±0.04   | 0.46±0.04          |
| <i>uex</i> <sup>MI01943</sup> / <i>uex</i> <sup>MI01943</sup> ; <i>UAS-uex/+</i> (1mM MgCl <sub>2</sub> food)       | 0.59±0.08    | 0.53±0.05   | 0.45±0.06          |
| <i>uex</i> <sup>MI01943</sup> / <i>uex</i> <sup>MI01943</sup> ; <i>UAS-uex/+</i> (80mM MgCl <sub>2</sub> food)      | 0.50±0.07    | 0.49±0.03   | 0.48±0.05          |
| <i>c739,uex</i> <sup>MI01943</sup> / <i>uex</i> <sup>MI01943</sup> ; <i>UAS-uex/+</i> (1mM MgCl <sub>2</sub> food)  | 0.49±0.03    | 0.50±0.04   | 0.56±0.04          |
| <i>c739,uex</i> <sup>MI01943</sup> / <i>uex</i> <sup>MI01943</sup> ; <i>UAS-uex/+</i> (80mM MgCl <sub>2</sub> food) | 0.56±0.03    | 0.48±0.06   | 0.47±0.06          |

|                                                                             |           |           |           |
|-----------------------------------------------------------------------------|-----------|-----------|-----------|
| <i>wild-type</i>                                                            | 0.55±0.03 | 0.52±0.03 | 0.56±0.03 |
| <i>uex</i> <sup>MI01943</sup> /+                                            | 0.53±0.04 | 0.48±0.04 | 0.48±0.03 |
| <i>uex</i> <sup>MI01943</sup> / <i>uex</i> <sup>MI01943</sup>               | 0.58±0.04 | 0.53±0.04 | 0.44±0.02 |
| <i>uex</i> <sup>MI01943.ex1</sup> / <i>uex</i> <sup>MI01943.ex1</sup>       | 0.62±0.07 | 0.49±0.03 | 0.51±0.03 |
| <i>uex</i> <sup>MI01943.ex2</sup> / <i>uex</i> <sup>MI01943.ex2</sup>       | 0.60±0.04 | 0.51±0.02 | 0.48±0.07 |
| <i>wild-type</i>                                                            | 0.52±0.04 | 0.45±0.06 | 0.47±0.07 |
| <i>uex</i> <sup>Δ</sup> /+                                                  | 0.47±0.06 | 0.49±0.05 | 0.41±0.03 |
| <i>uex</i> <sup>Δ</sup> / <i>uex</i> <sup>MI01943</sup>                     | 0.53±0.07 | 0.44±0.03 | 0.40±0.02 |
| <i>uex</i> <sup>MI01943</sup> /+                                            | 0.52±0.07 | 0.37±0.06 | 0.35±0.03 |
| <i>wild-type</i>                                                            | 0.50±0.04 | 0.44±0.05 | 0.47±0.02 |
| <i>UAS-uex</i> <sup>RNAi</sup> /+                                           | 0.57±0.04 | 0.50±0.06 | 0.55±0.06 |
| <i>c739</i> /+                                                              | 0.58±0.06 | 0.42±0.06 | 0.43±0.03 |
| <i>c739</i> /+; <i>UAS-uex</i> <sup>RNAi</sup> /+                           | 0.55±0.04 | 0.56±0.04 | 0.54±0.05 |
| <i>c305a</i> /+                                                             | 0.46±0.05 | 0.46±0.08 | 0.54±0.08 |
| <i>c305a</i> /+; <i>UAS-uex</i> <sup>RNAi</sup> /+                          | 0.48±0.04 | 0.45±0.03 | 0.62±0.07 |
| <i>NP7175</i> /+                                                            | 0.56±0.05 | 0.44±0.04 | 0.50±0.08 |
| <i>NP7175</i> /+; <i>UAS-uex</i> <sup>RNAi</sup> /+                         | 0.65±0.03 | 0.52±0.06 | 0.53±0.06 |
| <i>0770</i> /+                                                              | 0.50±0.03 | 0.45±0.04 | 0.38±0.04 |
| <i>0770</i> /+; <i>UAS-uex</i> <sup>RNAi</sup> /+                           | 0.45±0.05 | 0.39±0.07 | 0.47±0.06 |
| <i>wild-type</i>                                                            | 0.51±0.04 | 0.47±0.05 | 0.42±0.05 |
| <i>UAS-uex</i> <sup>RNAi</sup> /+                                           | 0.44±0.05 | 0.45±0.03 | 0.51±0.04 |
| <i>c739</i> /+; <i>Gal80</i> <sup>ts</sup> /+                               | 0.54±0.04 | 0.50±0.04 | 0.52±0.04 |
| <i>c739</i> /+; <i>Gal80</i> <sup>ts</sup> / <i>UAS-uex</i> <sup>RNAi</sup> | 0.49±0.05 | 0.43±0.05 | 0.44±0.02 |

|                                                                                                |           |           |           |
|------------------------------------------------------------------------------------------------|-----------|-----------|-----------|
| <i>wild-type</i>                                                                               | 0.63±0.04 | 0.48±0.04 | 0.54±0.04 |
| <i>uex</i> <sup>MI01943</sup> / <i>uex</i> <sup>MI01943</sup> ;UAS- <i>uex</i> /+              | 0.51±0.03 | 0.52±0.04 | 0.48±0.03 |
| <i>uex</i> <sup>MI01943</sup> / <i>uex</i> <sup>MI01943</sup> ;MB247/+                         | 0.53±0.04 | 0.62±0.03 | 0.59±0.04 |
| <i>uex</i> <sup>MI01943</sup> / <i>uex</i> <sup>MI01943</sup> ;MB247/UAS- <i>uex</i>           | 0.65±0.05 | 0.59±0.03 | 0.64±0.03 |
| <i>c739,uex</i> <sup>MI01943</sup> / <i>uex</i> <sup>MI01943</sup>                             | 0.57±0.04 | 0.49±0.03 | 0.45±0.08 |
| <i>c739,uex</i> <sup>MI01943</sup> / <i>uex</i> <sup>MI01943</sup> ;UAS- <i>uex</i> /+         | 0.55±0.04 | 0.57±0.03 | 0.54±0.08 |
|                                                                                                |           |           |           |
| <i>wild-type</i>                                                                               | 0.58±0.04 | 0.50±0.04 | 0.55±0.05 |
| <i>c739,uex</i> <sup>MI01943</sup> /+                                                          | 0.55±0.03 | 0.52±0.04 | 0.54±0.07 |
| <i>uex</i> <sup>MI01943</sup> / <i>uex</i> <sup>MI01943</sup> ;UAS-CNNM2 <sup>WT</sup> /+      | 0.54±0.03 | 0.47±0.03 | 0.50±0.05 |
| <i>c739,uex</i> <sup>MI01943</sup> / <i>uex</i> <sup>MI01943</sup> ;UAS-CNNM2 <sup>WT</sup> /+ | 0.58±0.03 | 0.54±0.02 | 0.52±0.06 |
|                                                                                                |           |           |           |
| <i>wild-type</i>                                                                               | 0.49±0.04 | 0.43±0.04 | 0.49±0.03 |
| <i>uex</i> <sup>T626NRR</sup> / <i>uex</i> <sup>T626NRR</sup>                                  | 0.58±0.04 | 0.52±0.03 | 0.53±0.03 |
| <i>uex</i> <sup>T626NRR</sup> /+                                                               | 0.53±0.05 | 0.45±0.05 | 0.40±0.03 |
| <i>uex</i> <sup>MI01943</sup> / <i>uex</i> <sup>T626NRR</sup>                                  | 0.56±0.05 | 0.47±0.02 | 0.42±0.06 |
| <i>uex</i> <sup>MI01943</sup> /+                                                               | 0.61±0.04 | 0.48±0.04 | 0.55±0.08 |
