# Supplementary material for: Magnesium efflux from Drosophila Kenyon cells is critical for normal and diet-enhanced long-term memory
Source: eLife journal article supplement (doi:10.7554/elife.61339), 2020-11-26
Supplement: supp [file elife-61339-supp-v1.zip]

## A Mating scheme for the *Minos* excision lines:

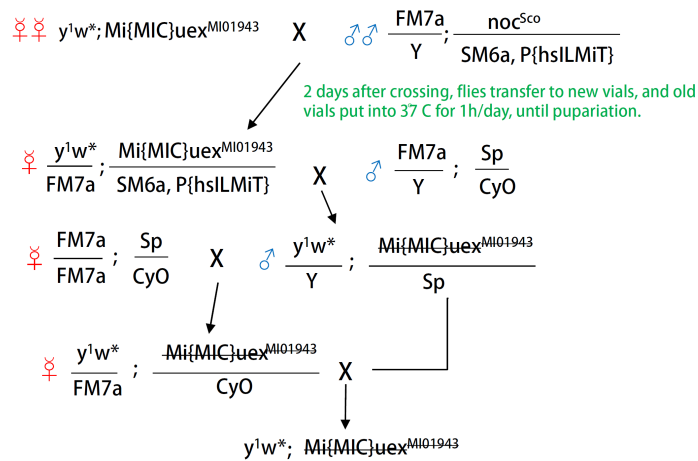

## B *Minos* excision sequence details:

Wild type

... GTACACTATATATAGGTATGACCG ...

MiMIC insertion line *uex*<sup>MI01943</sup>

... GTACACTATATATAGGTATGACCG ...

... GTACACTATATATACgagccccaaccact ... agtgggtgggctcgTAGGTATGACCG ...

MiMIC excision lines

MI01943.ex1 ... GTACACTATATATAGGTATGACCG ...

MI01943.ex2 ... GTACACTATATATAGGTATGACCG ...

AGGTATGACCG ...

AGGTATGACCG ...

## C CRISPR/Cas9 editing scheme for the *uex*Δ line:

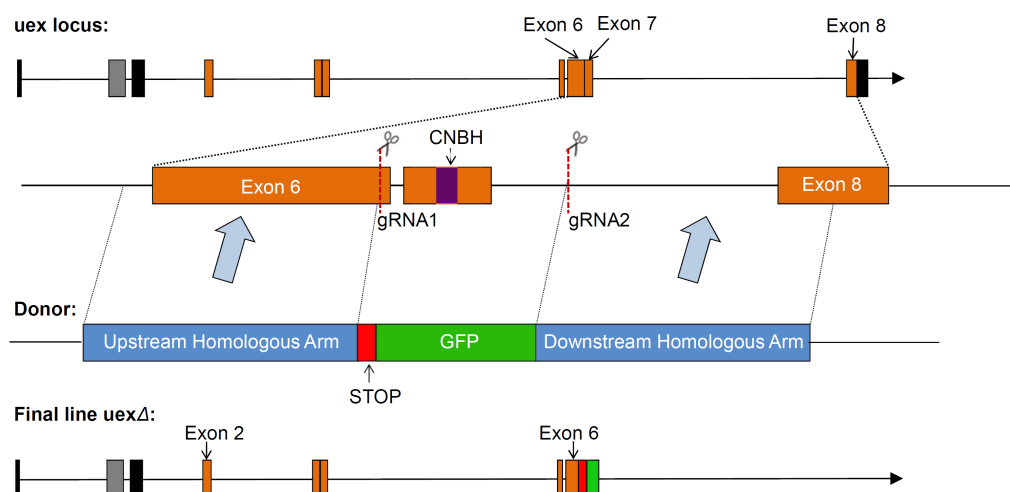

Figure 2- figure supplement 2
