# Supplementary material for: Magnesium efflux from Drosophila Kenyon cells is critical for normal and diet-enhanced long-term memory
Source: eLife journal article supplement (doi:10.7554/elife.61339), 2020-11-26
Supplement: supp [file elife-61339-supp-v1.zip]

Archive with 17 entries (17 files):
- elife_poa_e61339_Figure_1_figure_supplement_1.pdf
- elife_poa_e61339_Figure_2_figure_supplement_1.pdf
- elife_poa_e61339_Figure_2_figure_supplement_2.pdf
- elife_poa_e61339_Figure_2_figure_supplement_3.pdf
- elife_poa_e61339_Figure_3_figure_supplement_1.pdf
- elife_poa_e61339_Figure_4_figure_supplement_1.pdf
- elife_poa_e61339_Figure_5_figure_supplement_1.pdf
- elife_poa_e61339_Figure_5_figure_supplement_2.pdf
- elife_poa_e61339_Figure_8_figure_supplement_1.pdf
- elife_poa_e61339_Video_1.mp4
- elife_poa_e61339_Video_2.mp4
- elife_poa_e61339_Video_3.mp4
- elife_poa_e61339_Video_4.mp4
- elife_poa_e61339_Video_6.mp4
- elife_poa_e61339_Video_5.mp4
- elife_poa_e61339_Video_7.mp4
- elife_poa_e61339_Transparent_Reporting_File.docx
