# Supplementary figures and images for: Magnesium efflux from Drosophila Kenyon cells is critical for normal and diet-enhanced long-term memory
Source: eLife journal article supplement (doi:10.7554/elife.61339), 2020-11-26

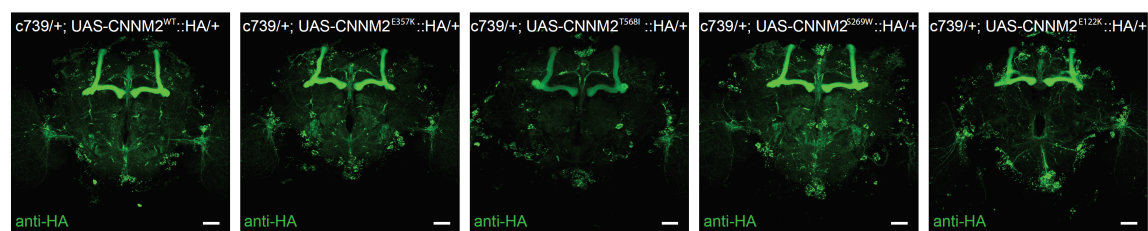

**Figure 5 – figure supplement 1**

Supplement: supp [file elife-61339-supp-v1.zip]

**A**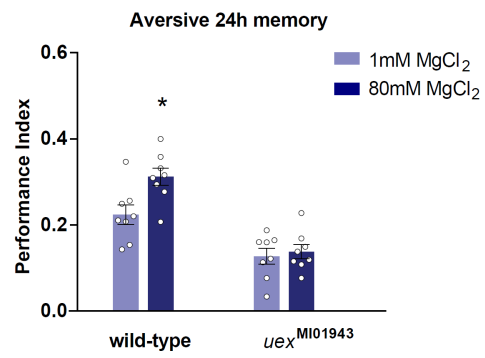**B**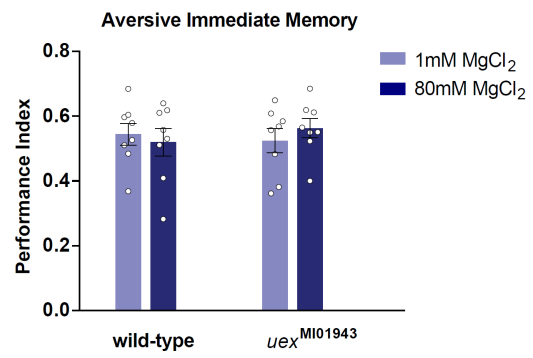

**Figure 4 – figure supplement 1**

Supplement: supp [file elife-61339-supp-v1.zip]

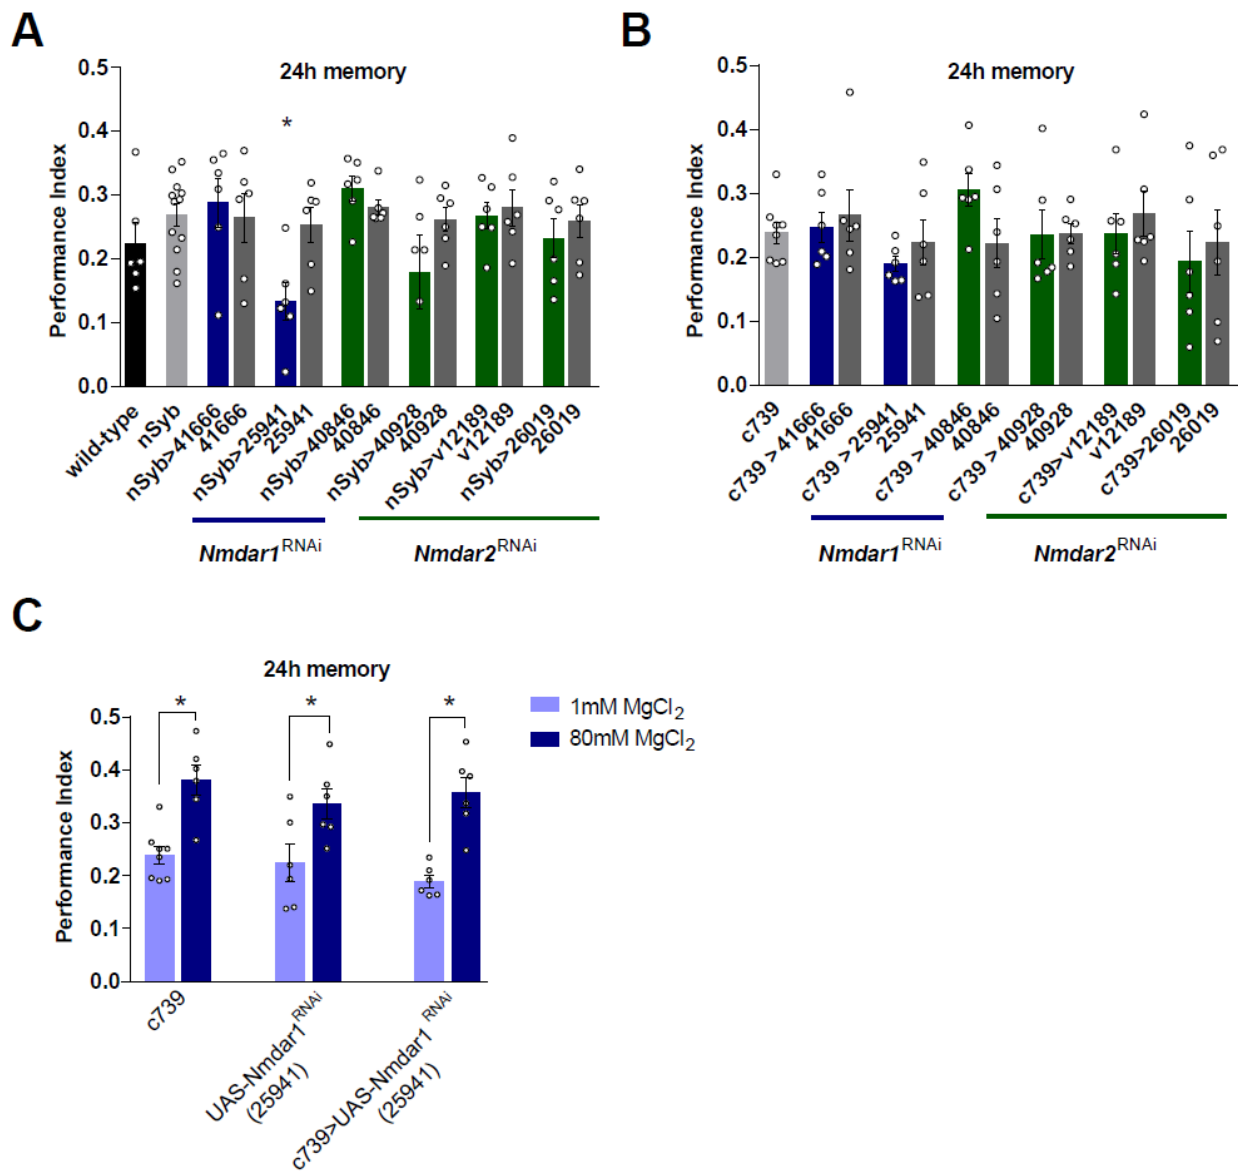

Figure 1 – figure supplement 1

Supplement: supp [file elife-61339-supp-v1.zip]

**A**

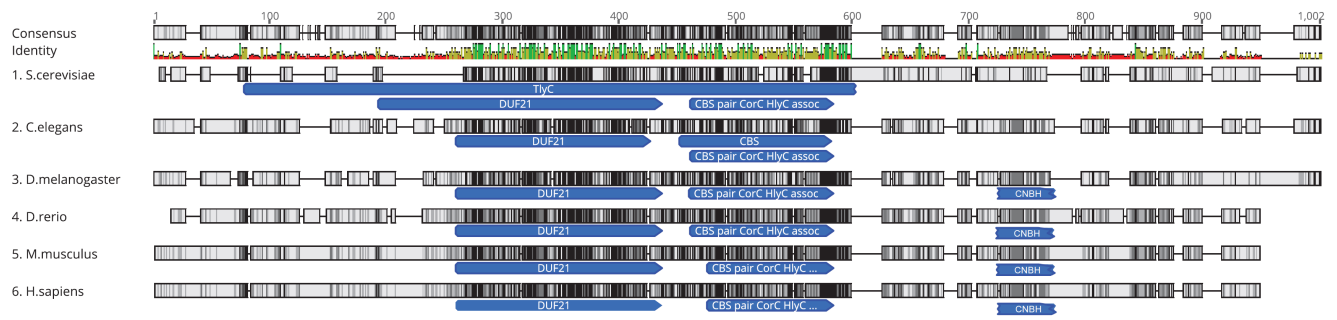

**B**

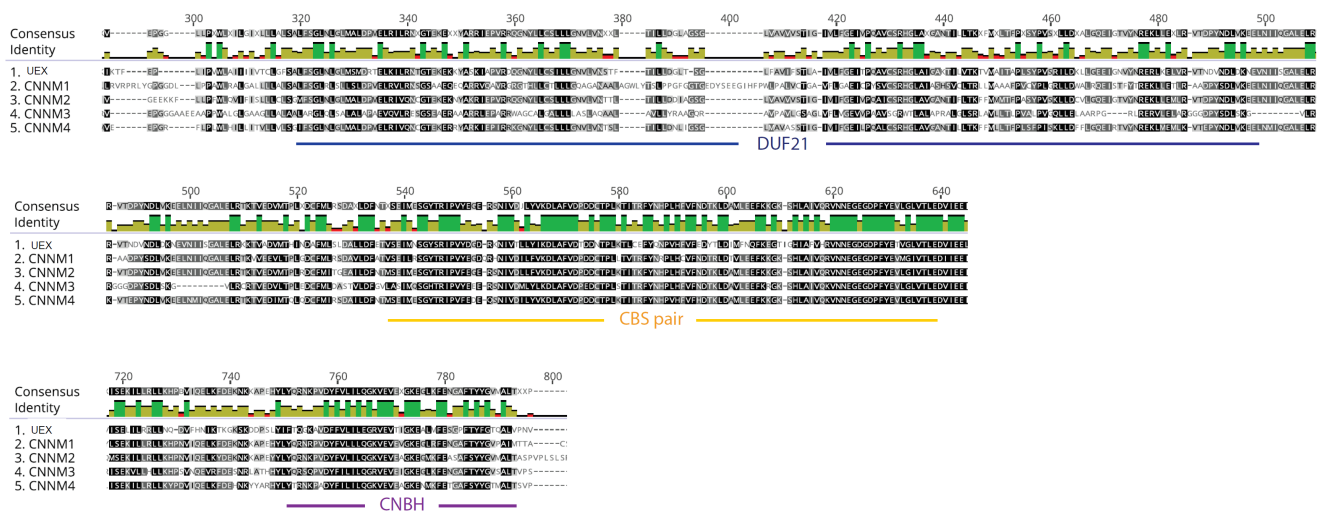

**C**

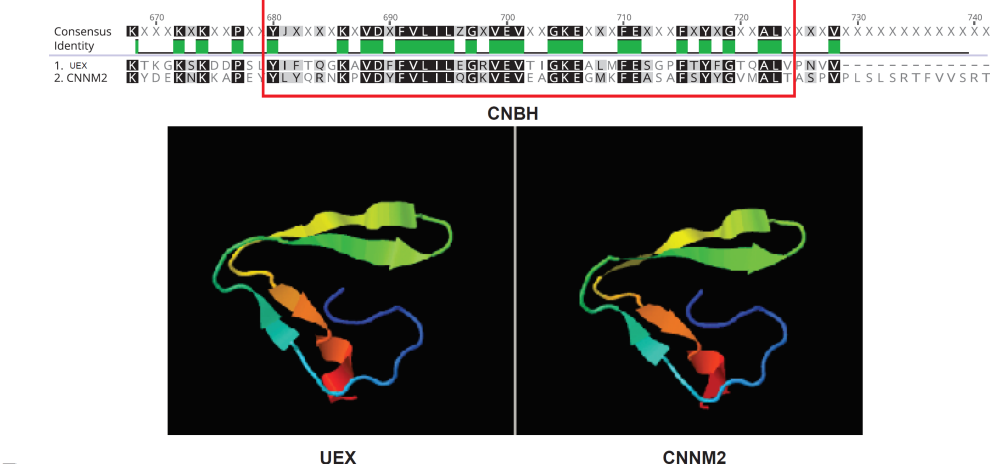

Figure 2 – figure supplement 1

Supplement: supp [file elife-61339-supp-v1.zip]

**A**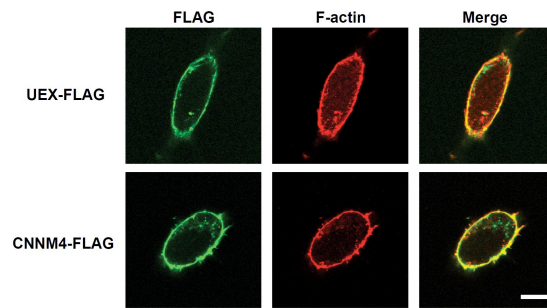**B**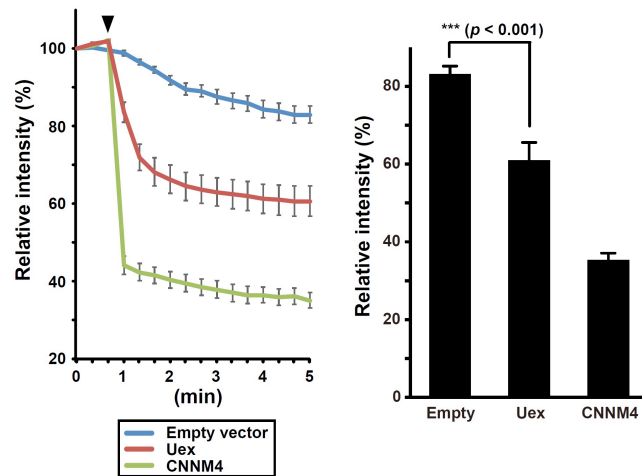

Figure 5 – figure supplement 2

Supplement: supp [file elife-61339-supp-v1.zip]

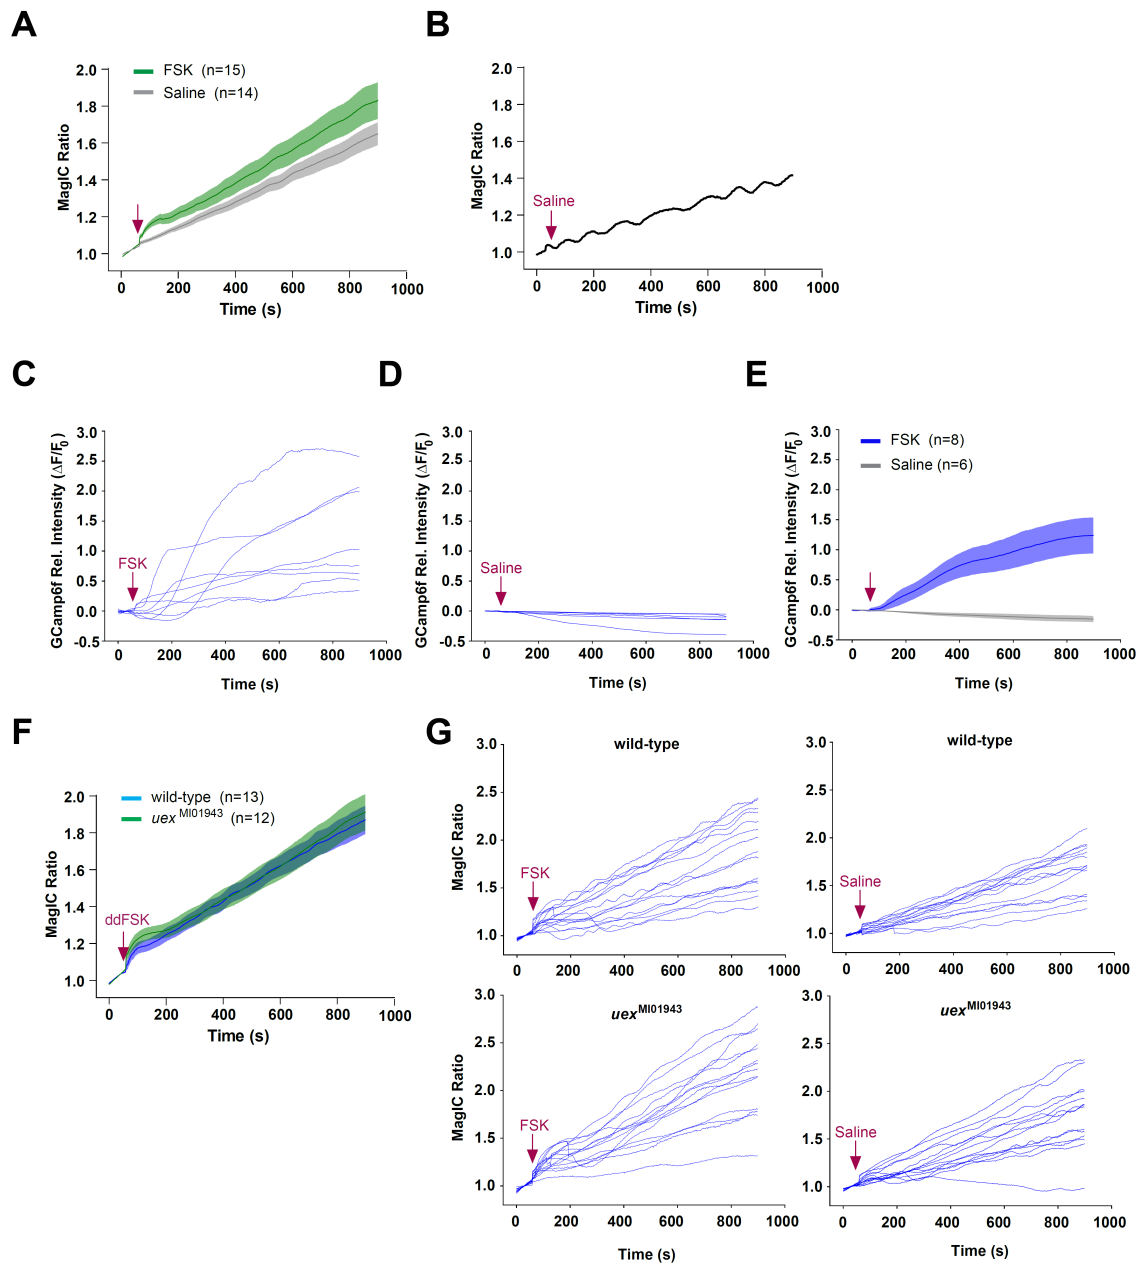

Figure 8 - figure supplement 1

Supplement: supp [file elife-61339-supp-v1.zip]

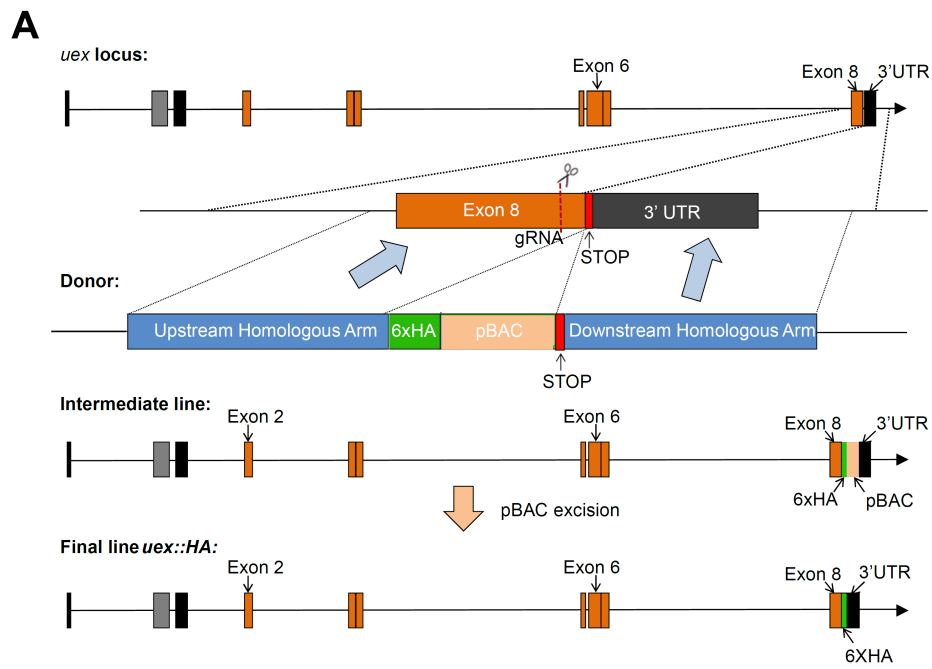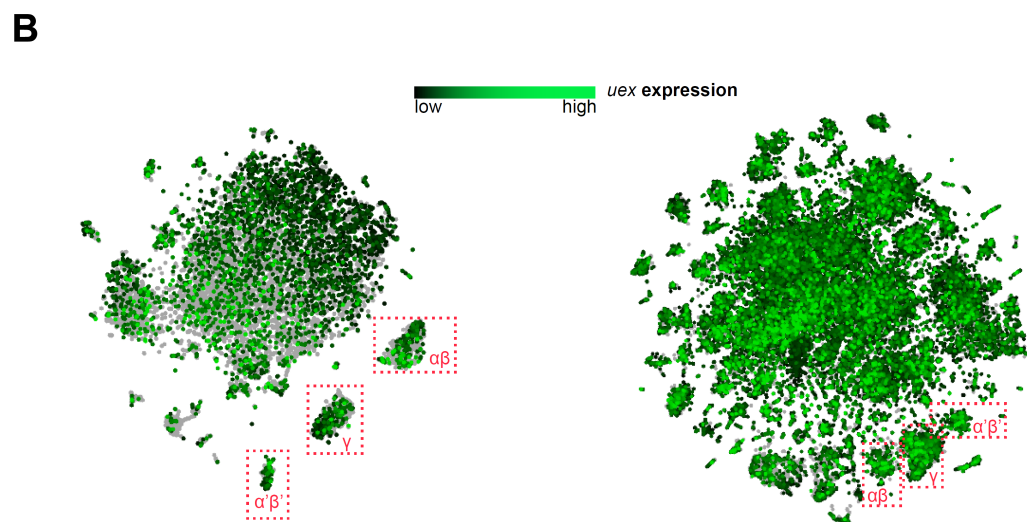

Figure 3 – figure supplement 1

Supplement: supp [file elife-61339-supp-v1.zip]
